# Supplementary material
Source: PubMed Central journal article supplement (PMC3115716)
Supplement: NIHMS27271-supplement-01.pdf [file NIHMS27271-supplement-01.pdf]

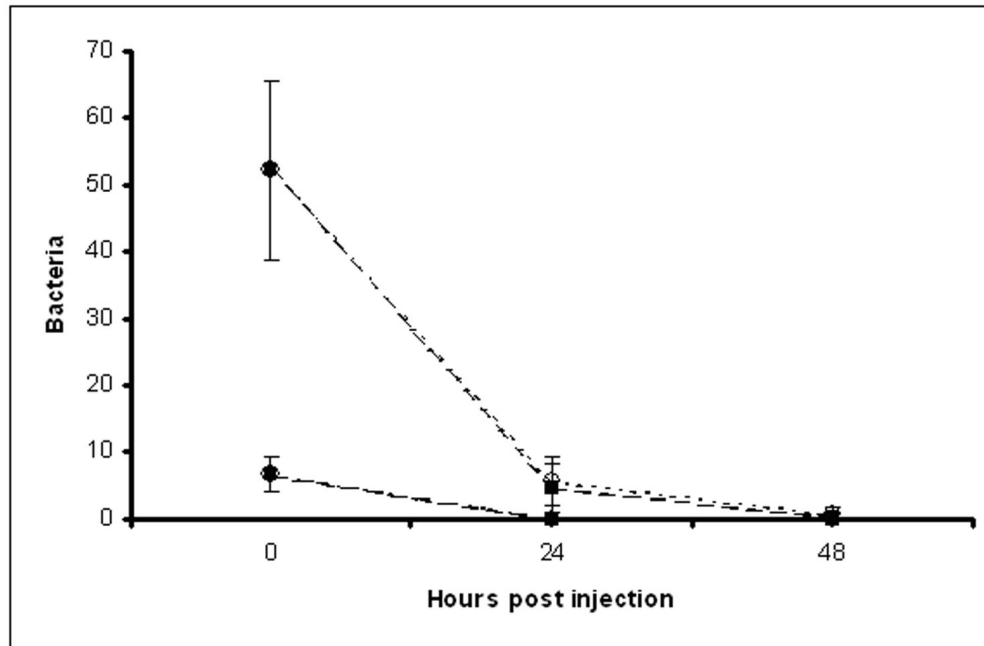

**Supplemental Fig 1.** Control (black squares) and *pu.1* morphant embryos (open circles) clear nonpathogenic *Escherichia coli* at the same rate. Data are almost completely overlapping at individual time points. Injection with dsRed-expressing *E. coli* leads to dose-dependant clearance of bacteria within 48 hours post injection. Time zero indicates inoculation dose and bacteria were enumerated in the fish by visual inspection for numbers of fluorescent bacteria. Error bars represent standard deviation from the mean.

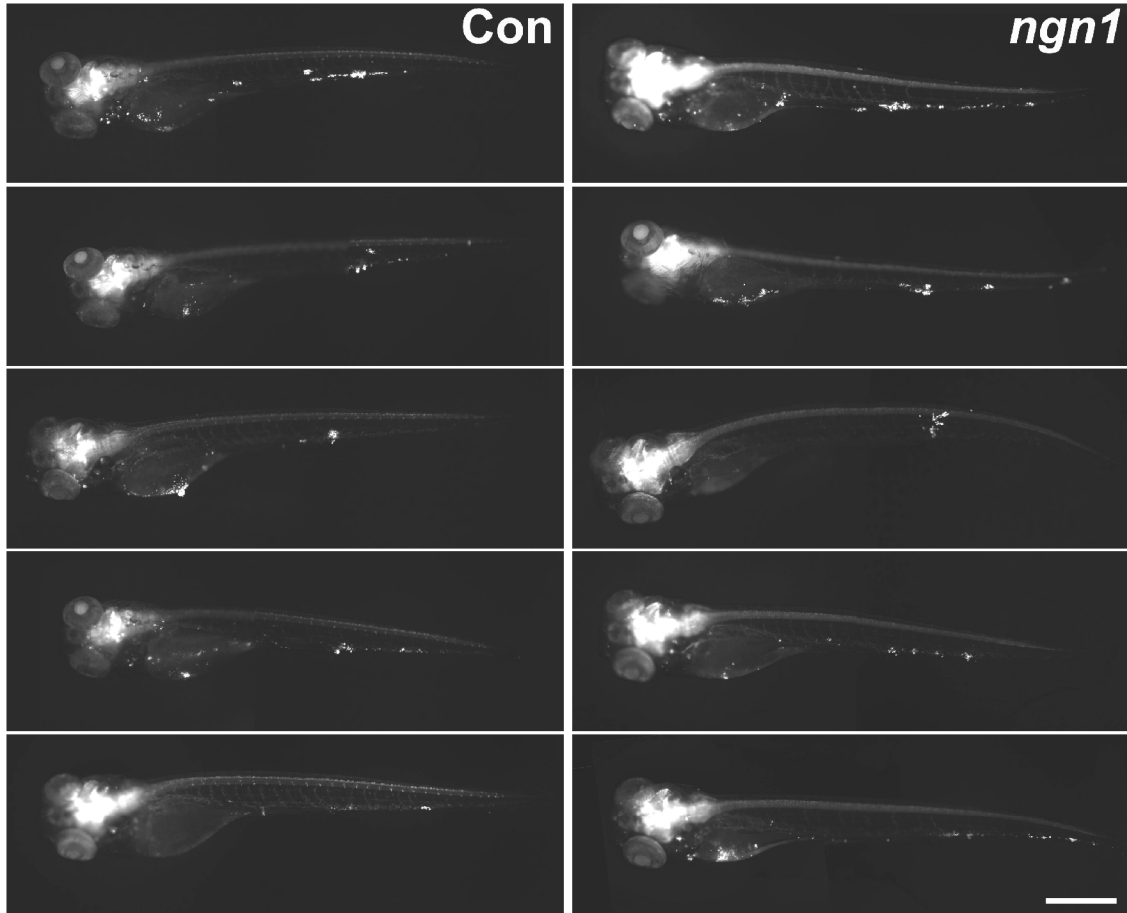

**Supplemental Fig 2.** Increased host mortality due to developmental defects does not recapitulate the *pu.1* morphant phenotype. *M. marinum*-infected neurogenin 1 mutant and clutch-matched control embryos were imaged at four dpi. Embryos express EGFP in some neural cells leading to increased fluorescence in head and along developing spine. Bacterial fluorescence is visible in the trunk and over the yolk.
